# Supplementary material for: Using Administrative Data to Ascertain True Cases of Muscular Dystrophy: Rare Disease Surveillance
Source: PubMed Central journal article supplement (PMC5269556; doi:10.2196/publichealth.6720), 2017-01-12
Supplement: publichealth_v3i1e2_app1.pdf [file publichealth_v3i1e2_app1.pdf]

| Multimedia Appendix 1. Variables for algorithm development from the passive data system to identify cases of muscular dystrophy, in five SC counties, 1998-2012 |                  |                      |          |                          |                      |          |                  |                      |          |
|-----------------------------------------------------------------------------------------------------------------------------------------------------------------|------------------|----------------------|----------|--------------------------|----------------------|----------|------------------|----------------------|----------|
| Passive Data System Element                                                                                                                                     | <i>Any MD*</i>   |                      |          | <i>Correct MD type**</i> |                      |          | <i>DBMD**</i>    |                      |          |
|                                                                                                                                                                 | Active Confirmed | Active Not-Confirmed | Accuracy | Active Confirmed         | Active Not-Confirmed | Accuracy | Active Confirmed | Active Not-Confirmed | Accuracy |
| <b><i>At Least 1 Code</i></b>                                                                                                                                   |                  |                      |          |                          |                      |          |                  |                      |          |
| Any MD Code – 359.0, 359.1 or 359.21                                                                                                                            | 260              | 277                  | 48%      | 260                      | 277                  | 48%      | 136              | 401                  | 25%      |
| Congenital Hereditary MD – 359.0                                                                                                                                | 68               | 146                  | 32%      | DS                       | DS                   | 5%       | n/a              |                      |          |
| Hereditary Progressive MD – 359.1                                                                                                                               | 175              | 172                  | 50%      | 119                      | 228                  | 34%      | 70               | 277                  | 20%      |
| Myotonic MD – 359.21 only                                                                                                                                       | DS               | DS                   | 88%      | 46                       | 12                   | 79%      | n/a              |                      |          |
| <b><i>1 Inpatient or 2 Other Medical Claims<sup>1</sup></i></b>                                                                                                 |                  |                      |          |                          |                      |          |                  |                      |          |
| Any MD Code – 359.0, 359.1 or 359.21                                                                                                                            | 224              | 154                  | 59%      | 224                      | 154                  | 59%      | 118              | 260                  | 31%      |
| Congenital Hereditary MD – 359.0                                                                                                                                | 47               | 73                   | 39%      | DS                       | DS                   | 8%       | n/a              |                      |          |
| Hereditary Progressive MD – 359.1                                                                                                                               | 149              | 99                   | 60%      | 107                      | 141                  | 43%      | 63               | 185                  | 25%      |
| Myotonic MD – 359.21 only                                                                                                                                       | DS               | DS                   | 88%      | DS                       | DS                   | 84%      | n/a              |                      |          |
| <b><i>Males &lt;=18 years of age with Code 359.1</i></b>                                                                                                        |                  |                      |          |                          |                      |          |                  |                      |          |
| At Least 1 Code                                                                                                                                                 | 82               | 23                   | 78%      | 57                       | 33                   | 63%      | 54               | 36                   | 60%      |
| 1 Inpatient or 2 Other Medical Claims <sup>1</sup>                                                                                                              | 77               | 16                   | 83%      | 54                       | 26                   | 68%      | 51               | 29                   | 64%      |
| No 359.0 or 359.21 Code                                                                                                                                         | 34               | 13                   | 72%      | 26                       | 15                   | 63%      | 26               | 15                   | 63%      |
| 359.1 Coded Neurology Claim                                                                                                                                     | DS               | DS                   | 83%      | 35                       | 15                   | 70%      | 33               | 17                   | 66%      |
| 359.1 Coded Other Specialty Claim (Cardiology, Genetics, Pulmonology, Orthopedics)                                                                              | 77               | 16                   | 83%      | 54                       | 26                   | 68%      | 51               | 29                   | 64%      |
| No Other Syndrome                                                                                                                                               | 65               | 17                   | 79%      | 48                       | 24                   | 67%      | 45               | 27                   | 63%      |
| Pharmacy Claim for Steroidst†                                                                                                                                   | DS               | DS                   | 80%      | 22                       | 13                   | 68%      | 22               | 13                   | 68%      |
| 3 or More 359.1 Codes                                                                                                                                           | 75               | 12                   | 86%      | 52                       | 22                   | 70%      | 49               | 25                   | 66%      |

|                        |    |    |     |    |    |     |    |    |     |
|------------------------|----|----|-----|----|----|-----|----|----|-----|
| 5 or More 359.1 Codes  | DS | DS | 91% | 49 | 14 | 78% | 46 | 17 | 73% |
| 7 or More 359.1 Codes  | DS | DS | 94% | DS | DS | 82% | 43 | 12 | 78% |
| 10 or More 359.1 codes | DS | DS | 96% | DS | DS | 87% | DS | DS | 82% |

DS – data suppressed due to small numbers

†Steroids include prescriptions for the following: prednisone or prednisolone

\*Counted if code identified a true case of any type of MD (actively confirmed cases with unknown type were included in this category).

\*\*Counted if code identified the correct type of MD or DBMD. Does not include active cases classified as unknown, except when any MD Code is included in the algorithm.
